# Supplementary material for: Association Between Bisphenol A Exposure and Risk of All-Cause and Cause-Specific Mortality in US Adults
Source: PubMed Central journal article supplement (PMC7431989; doi:10.1001/jamanetworkopen.2020.11620), 2020-08-17
Supplement: jamanetwopen-3-e2011620-s001.pdf [file jamanetwopen-3-e2011620-s001.pdf]

## Supplementary Online Content

Bao W, Liu B, Rong S, Dai SY, Trasande L, Lehmler H-J. Association between bisphenol A exposure and risk of all-cause and cause-specific mortality in US adults. *JAMA Netw Open.* 2020;3(8):e2011620. doi:10.1001/jamanetworkopen.2020.11620

**eTable.** Stratified Analyses for the Association of Urinary BPA Levels With Cause-Specific Mortality

This supplementary material has been provided by the authors to give readers additional information about their work.

**eTable. Stratified Analyses for the Association of Urinary BPA Levels With Cause-Specific Mortality**

| Variable                       |            | Tertiles of urinary BPA levels |                               |                   | P for interaction |
|--------------------------------|------------|--------------------------------|-------------------------------|-------------------|-------------------|
|                                |            | Tertile 1                      | Tertile 2                     | Tertile 3         |                   |
| <b>CVD mortality</b>           |            |                                |                               |                   |                   |
| Age                            | <65 years  | 1 (reference)                  | 0.70 (0.22-2.18) <sup>†</sup> | 1.67 (0.52-5.31)  | 0.71              |
|                                | ≥65 years  | 1 (reference)                  | 1.17 (0.49-2.79)              | 1.71 (0.51-5.73)  |                   |
| Sex                            | Male       | 1 (reference)                  | 1.08 (0.35-3.29)              | 1.75 (0.50-6.19)  | 0.49              |
|                                | Female     | 1 (reference)                  | 0.98 (0.37-2.63)              | 1.11 (0.30-4.16)  |                   |
| Race/ethnicity                 | Whites     | 1 (reference)                  | 1.72 (0.71-4.16)              | 1.83 (0.51-6.49)  | 0.72              |
|                                | Non-whites | 1 (reference)                  | 0.26 (0.07-1.00)              | 0.80 (0.35-1.82)  |                   |
| Diet quality <sup>#</sup>      | Lower      | 1 (reference)                  | 1.45 (0.58-3.61)              | 0.91 (0.28-2.94)  | 0.46              |
|                                | Higher     | 1 (reference)                  | 0.64 (0.19-2.19)              | 2.27 (0.72-7.22)  |                   |
| Physical activity <sup>*</sup> | Lower      | 1 (reference)                  | 1.25 (0.55-2.84)              | 0.93 (0.30-2.90)  | 0.63              |
|                                | Higher     | 1 (reference)                  | 0.60 (0.13-2.71)              | 2.13 (0.40-11.36) |                   |
| Obesity                        | BMI < 30   | 1 (reference)                  | 0.95 (0.32-2.80)              | 1.28 (0.50-3.29)  | 0.14              |
|                                | BMI ≥ 30   | 1 (reference)                  | 1.55 (0.43-5.66)              | 1.73 (0.29-10.2)  |                   |
| <b>Cancer mortality</b>        |            |                                |                               |                   |                   |
| Age                            | <65 years  | 1 (reference)                  | 1.03 (0.33-3.13)              | 1.08 (0.31-3.71)  | 0.29              |
|                                | ≥65 years  | 1 (reference)                  | 1.00 (0.40-2.47)              | 1.03 (0.36-2.92)  |                   |
| Sex                            | Male       | 1 (reference)                  | 0.68 (0.29-1.59)              | 0.82 (0.36-1.87)  | 0.17              |
|                                | Female     | 1 (reference)                  | 1.75 (0.45-6.81)              | 1.28 (0.27-6.11)  |                   |
| Race/ethnicity                 | Whites     | 1 (reference)                  | 1.08 (0.30-3.81)              | 0.92 (0.27-3.10)  | 0.46              |

|                                |            |               |                  |                  |      |
|--------------------------------|------------|---------------|------------------|------------------|------|
|                                | Non-whites | 1 (reference) | 1.12 (0.45-2.81) | 1.11 (0.48-2.60) |      |
| Diet quality <sup>#</sup>      | Lower      | 1 (reference) | 1.64 (0.56-4.78) | 1.24 (0.36-4.23) | 0.21 |
|                                | Higher     | 1 (reference) | 0.40 (0.10-1.59) | 0.60 (0.17-2.12) |      |
| Physical activity <sup>*</sup> | Lower      | 1 (reference) | 1.10 (0.28-4.26) | 0.49 (0.10-2.37) | 0.94 |
|                                | Higher     | 1 (reference) | 1.06 (0.40-2.81) | 1.89 (0.74-4.80) |      |
| Obesity                        | BMI < 30   | 1 (reference) | 1.45 (0.57-3.68) | 1.47 (0.59-3.64) | 0.65 |
|                                | BMI ≥ 30   | 1 (reference) | 0.77 (0.17-3.59) | 0.59 (0.14-2.44) |      |

<sup>#</sup> Lower or higher diet quality was defined as the healthy eating index (HEI) < the median score or ≥ the median score, respectively.

<sup>\*</sup> Lower or higher physical activity level was defined as below or meeting the physical activity guidelines, respectively.

Adjustment for age, sex, race/ethnicity, urinary creatinine levels, education, family income status, smoking, alcohol drinking, physical activity, total energy intake, HEI2010 score, and BMI.

<sup>†</sup> HR (95% CI).
